# Supplementary material
Source: PubMed Central journal article supplement (PMC7110107)
Supplement: EMBJ-39-e103255-s002.pdf [file EMBJ-39-e103255-s002.pdf]

## Expanded View Figures

**Figure EV1. No apparent phenotype was observed in *Islr* cKO mice at homeostasis.**

- A X-gal staining showing the *Twist2*<sup>+Cre</sup> activity in stromal cells using *Twist2*<sup>+Cre</sup>; *R26R*<sup>LacZ</sup> mice. Scale bar: 50  $\mu$ m.
- B Schematics of *Islr* genomic locus and strategy for generating loxP-targeted alleles.
- C qRT-PCR for *Islr* in intestinal and colonic tissues from control and cKO mice;  $n = 4$ .
- D Western blotting for *Islr* in colonic tissues from control and cKO mice.  $\alpha$ -Tubulin was used as a loading control.
- E *In situ* hybridization for *Islr* with RNAscope probe in colons from control and cKO mice, showing that *Islr* is deleted in stromal cells, while not in the epithelial cells. Dashed lines marked the border of epithelium;  $n = 3$ . Scale bar: 25  $\mu$ m.
- F H&E staining of colons from control and cKO mice, which is identical to panels with non-DSS in Fig 3C. Scale bar: 100  $\mu$ m.
- G Double immunofluorescence for Ki67 and  $\beta$ -catenin, immunohistochemistry for cleaved caspase3 (Casp3), and PAS staining in colons from control and cKO mice;  $n = 3$ . Scale bar: 50  $\mu$ m.
- H Quantification for crypt number, Ki67<sup>+</sup> cells, and Casp3<sup>+</sup> and PAS<sup>+</sup> cells in (G);  $n = 4$ .
- I Immunohistochemistry for CD45 and immunofluorescence for F4/80 in colons from control and cKO mice after 5-day DSS treatment;  $n = 3$ . Scale bar: 100  $\mu$ m.
- Data information: In (C and H), data are presented as mean  $\pm$  SD. \*\* $P < 0.01$  (Student's *t*-test).  
Source data are available online for this figure.

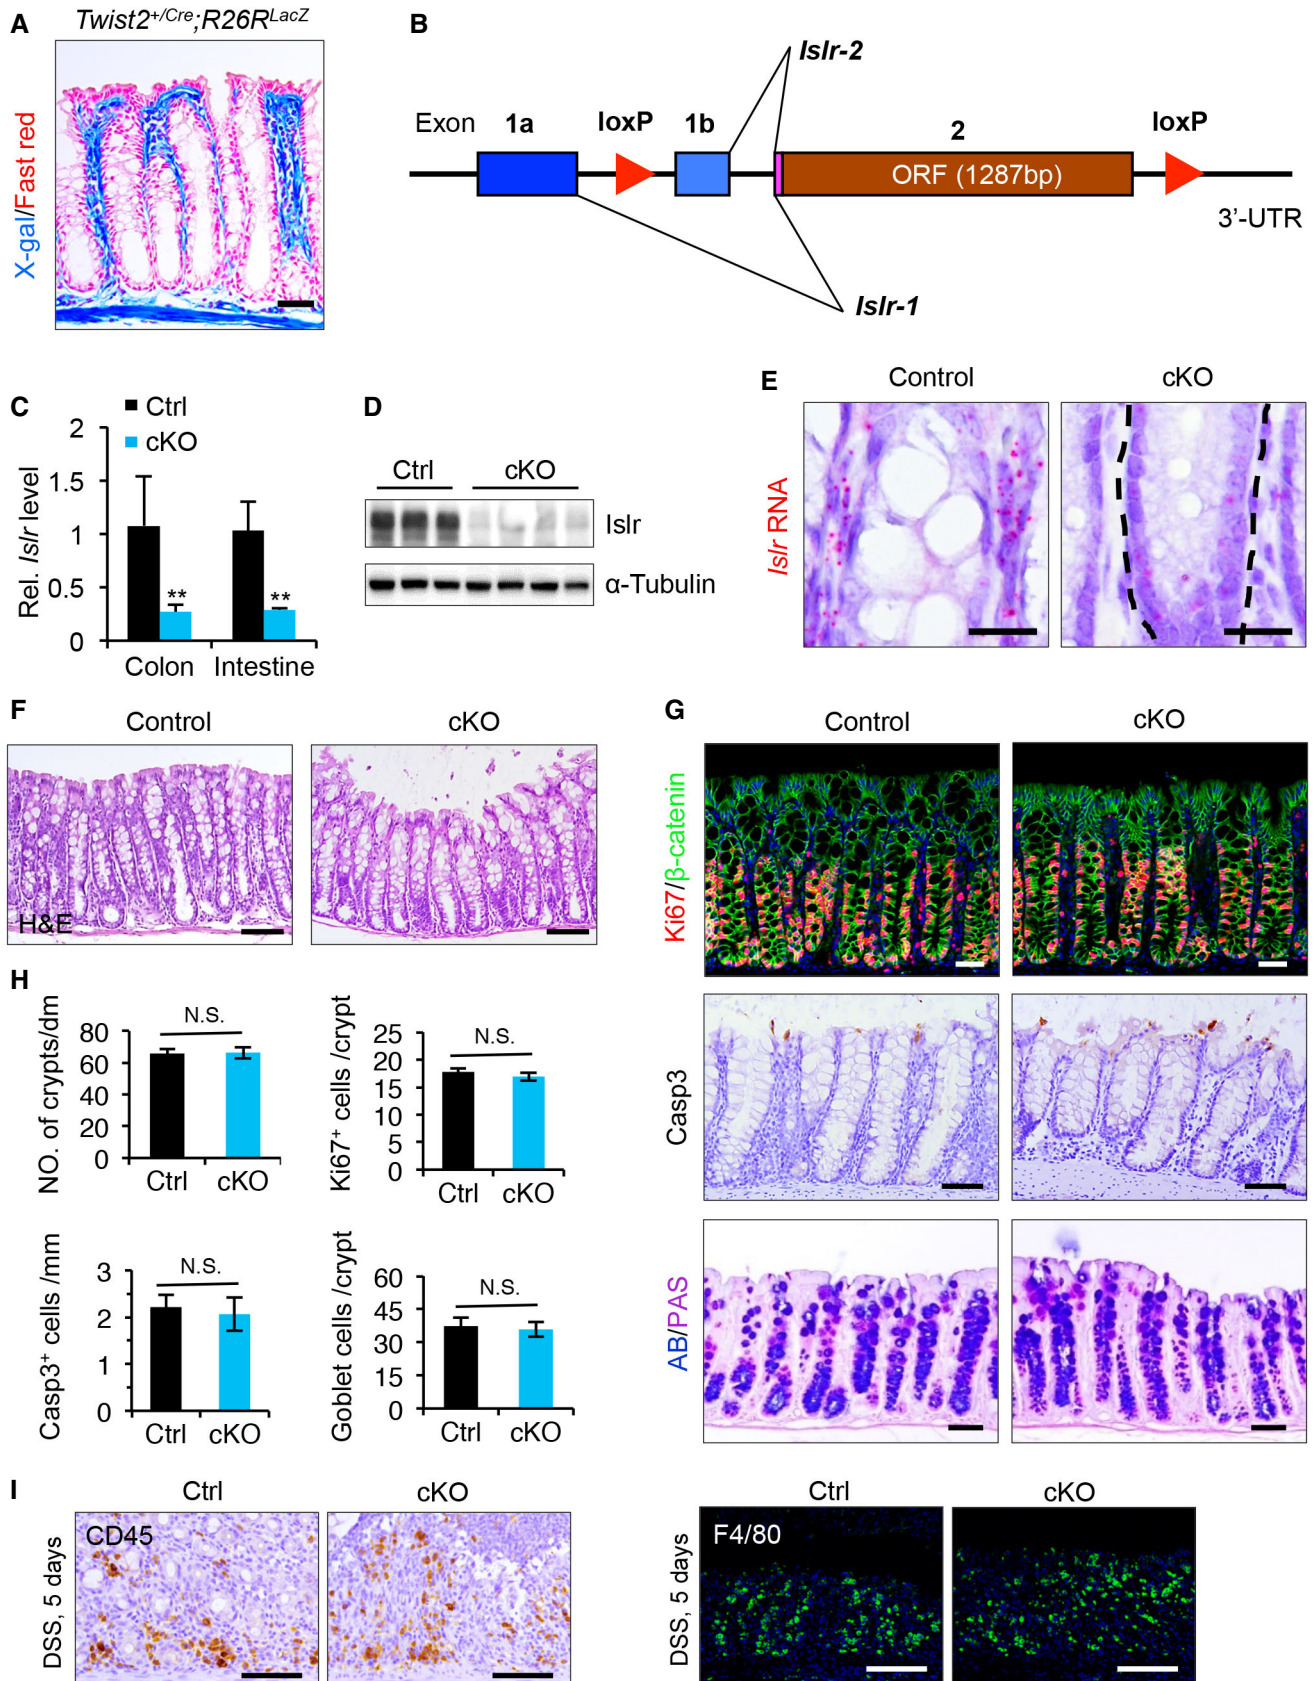

Figure EV1.

**Figure EV2. Deletion of *Islr* in stromal cells impaired intestinal epithelial regeneration in TNBS-induced colitis.**

- A Quantification of body weight change in control ( $n = 8$ ) and cKO ( $n = 8$ ) mice after TNBS treatment.
- B Gross images of colons from control ( $n = 5$ ) and cKO ( $n = 5$ ) mice 4 days after TNBS treatment, and quantification of colon length from control and cKO mice.
- C Histological images of colonic inflamed mucosa from control and cKO mice at indicated timepoints after TNBS treatment;  $n = 4$ . Scale bar: 100  $\mu\text{m}$ .
- D Quantification of the clinical score of inflamed mucosa in control and cKO mice;  $n = 5$ .
- E Double immunofluorescence for Ki67 and  $\beta$ -catenin in colonic inflamed mucosa from control and cKO mice at indicated timepoints after TNBS treatment;  $n = 4$ . Scale bar: 100  $\mu\text{m}$ .
- F Quantification of the percentage of Ki67<sup>+</sup> cells versus epithelial cells at 3 days after TNBS treatment;  $n = 4$ .

Data information: In (A, B, D, and F), data are presented as mean  $\pm$  SD. \*\* $P < 0.01$ ; \*\*\* $P < 0.001$  (Student's  $t$ -test).

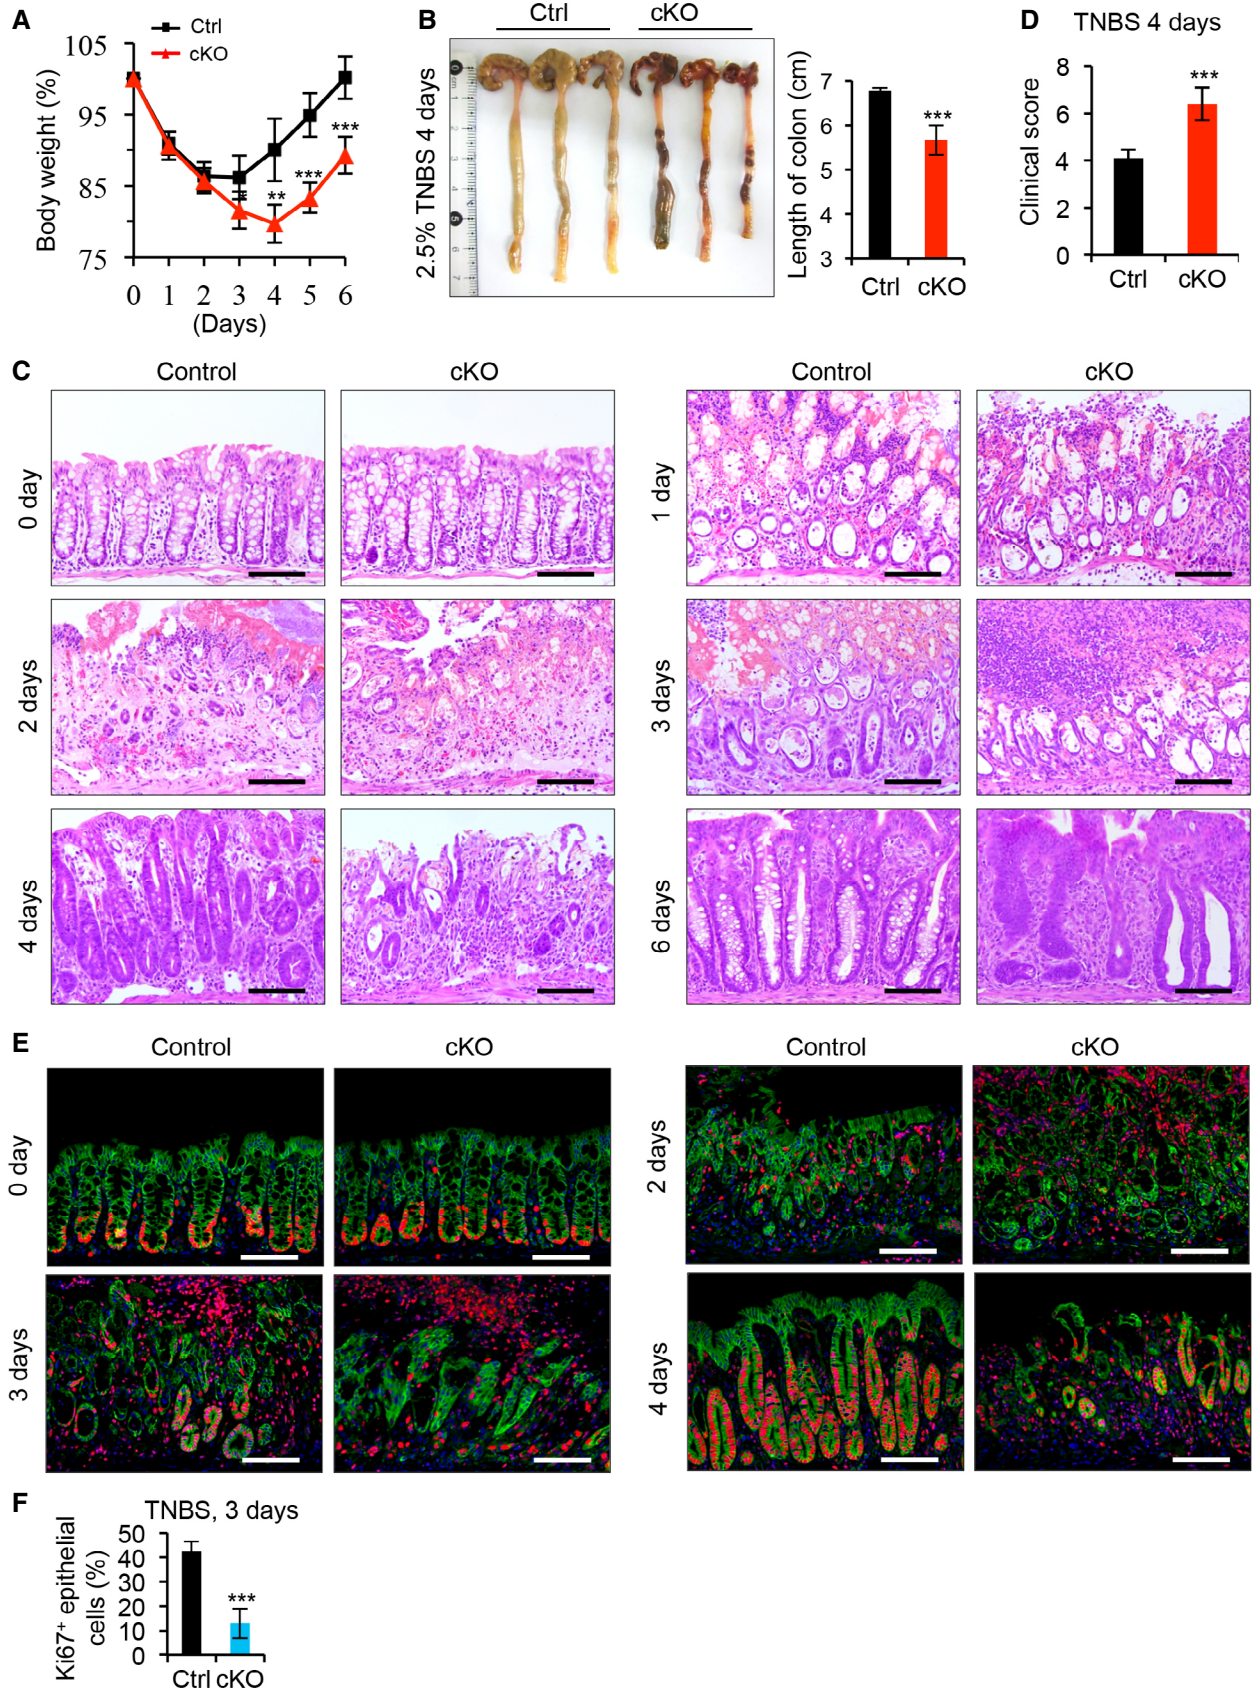

Figure EV2.

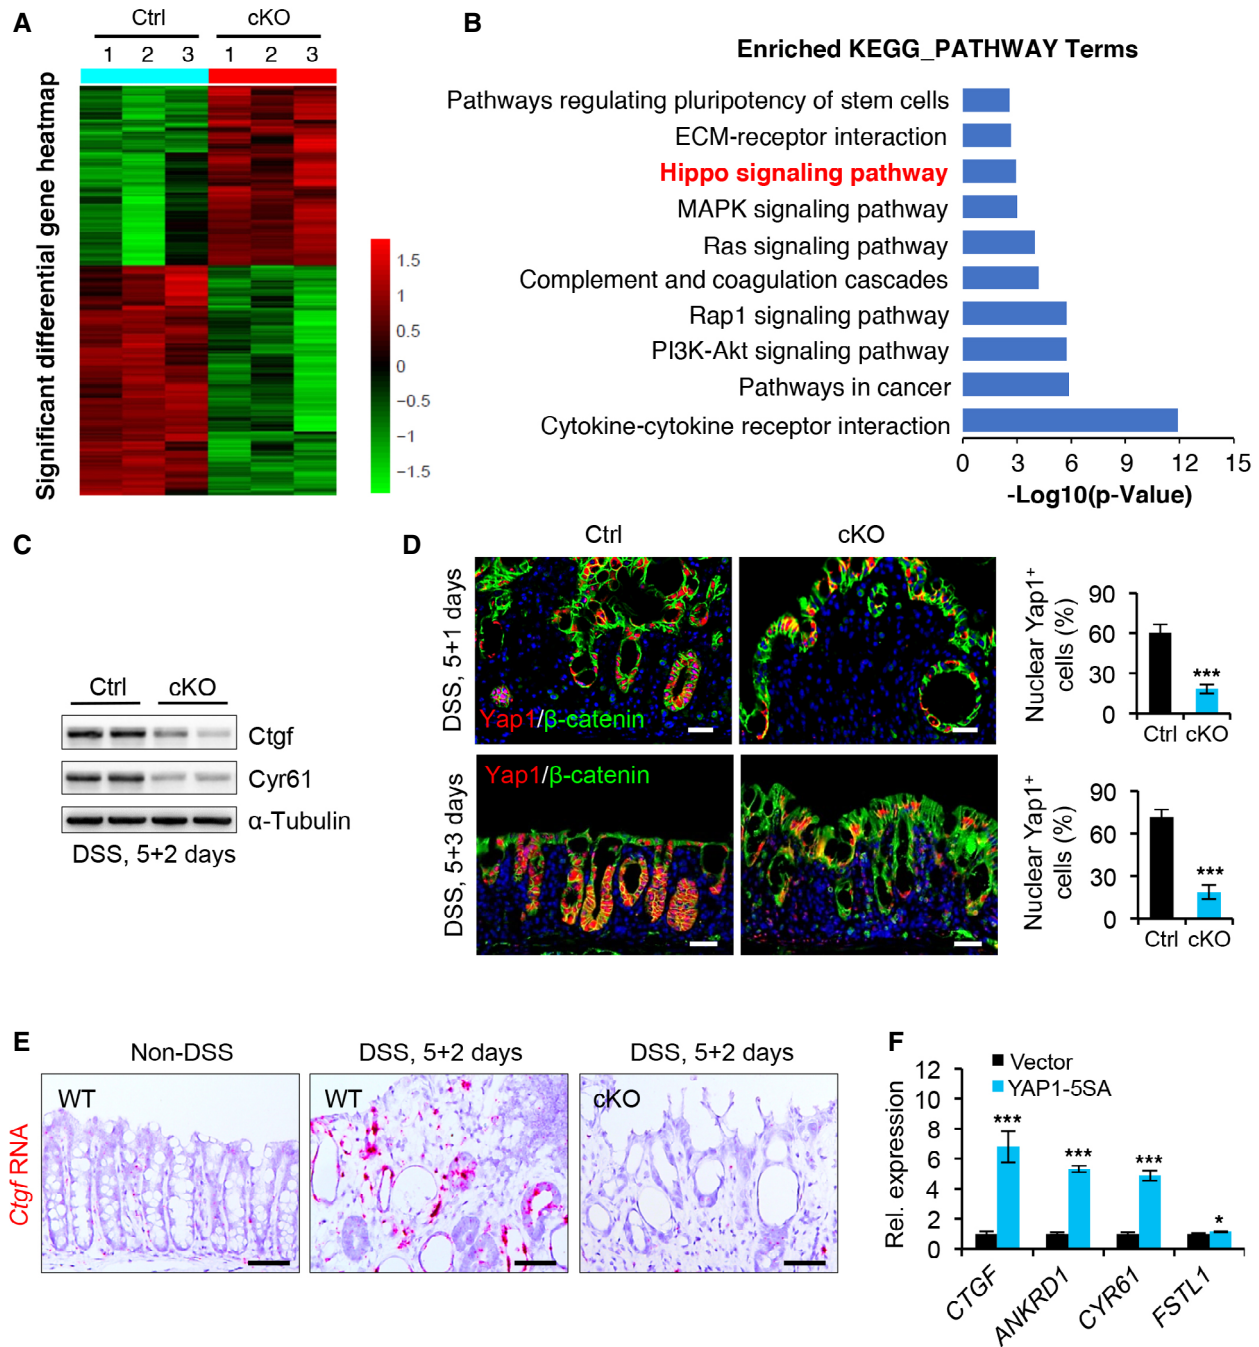

**Figure EV3. Deletion of *Islr* in stromal cells suppressed epithelial Hippo signaling.**

**A** Heatmaps of differentially expressed genes (DEGs) in colons from control and cKO mice 1 day after DSS removal. Note: The cutoff is  $P < 0.05$  and fold  $> 2$ . The parameter of the color key indicated the fold changes converted to  $\log_2$  of signal value normalized.

**B** KEGG pathway analysis of DEGs in cKO mice.

**C** Western blotting for Ctgf and Cyr61 in colon tissues from control and cKO mice 2 days after 5-day DSS treatment.  $\alpha$ -Tubulin was used as a loading control.

**D** Double immunofluorescence for Yap1 and  $\beta$ -catenin in the colons from control and cKO mice 1 or 3 days after 5-day DSS treatment. Control,  $n \geq 3$  at each timepoint; cKO,  $n \geq 3$  at each timepoint. Scale bar: 50  $\mu\text{m}$ .

**E** RNAscope *in situ* hybridization assay for Ctgf in colonic epithelium from WT mice or control and cKO mice 2 days after 5-day DSS treatment. Scale bar: 25  $\mu\text{m}$ .

**F** qRT-PCR analysis for *CTGF*, *ANKRD1*, *CYR61*, and *FSTL1* in NCM460 colon epithelial cells transfected with vector or YAP1-5SA. \* $P < 0.05$ ; \*\*\* $P < 0.001$ .

Data information: In (D and F), data are presented as mean  $\pm$  SD. \* $P < 0.05$ ; \*\*\* $P < 0.001$  (Student's *t*-test).

Source data are available online for this figure.

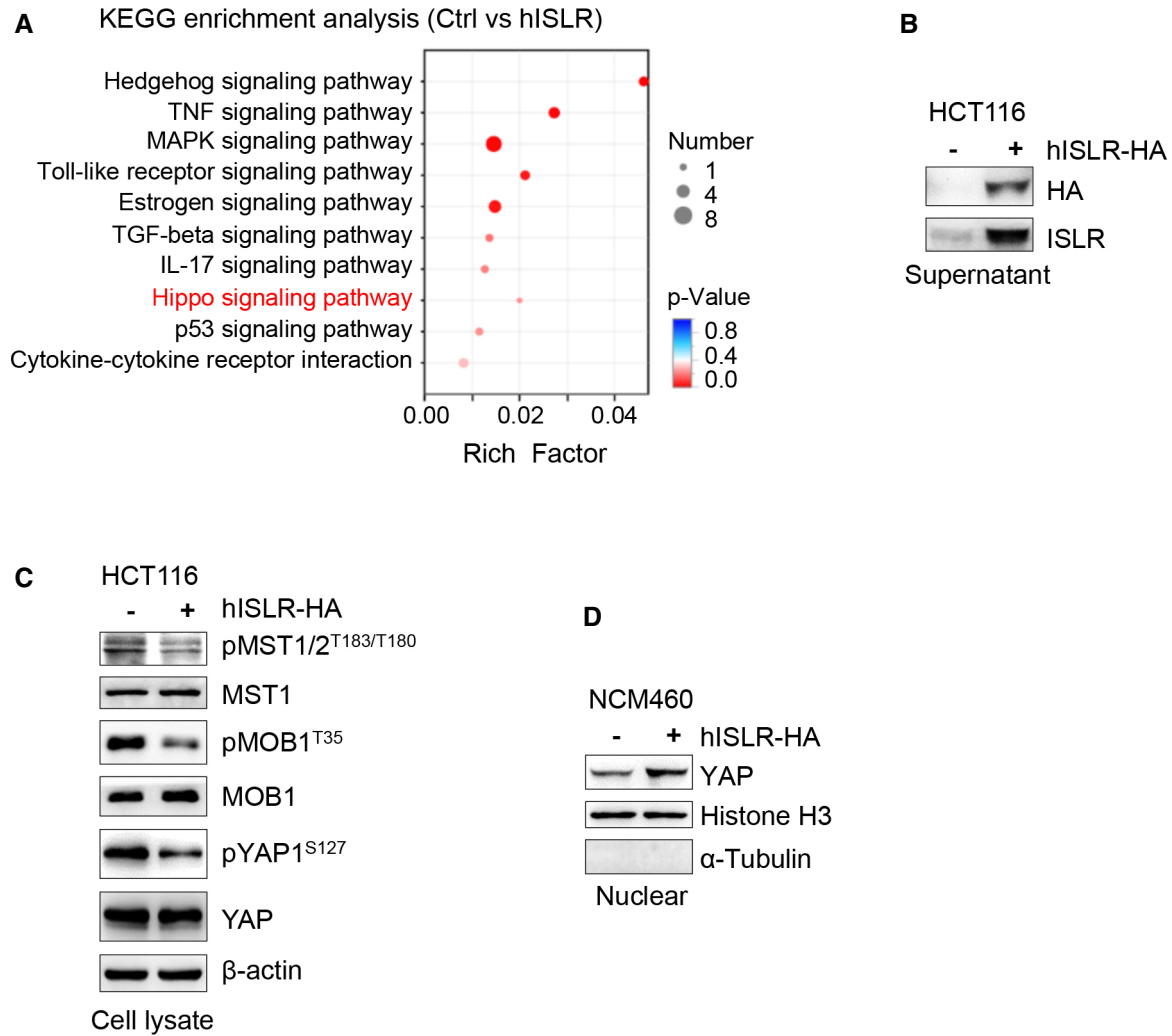

**Figure EV4. Stromal cell-secreted Islr suppressed epithelial Hippo signaling and activated YAP.**

A KEGG enrichment analysis in DEGs of hISLR overexpressing HEK293FT cells.

B Western blotting for HA and ISLR in the supernatant from HCT116 CRC cells transfected with pcDNA3.1 or pcDNA3.1-hISLR-HA plasmids.

C Western blotting for pMST1/2, MST1, pMOB1 and MOB1, pYAP, and YAP in lysates from HCT116 CRC cells cultured in the supernatants with or without hISLR-HA. β-actin was used as a loading control.

D Western blotting for YAP in nuclear proteins isolated from NCM460 colon epithelial cells cultured in the supernatant with or without hISLR-HA. Histone H3, a positive control for nuclear proteins. α-Tubulin, a positive control for cytoplasmic proteins.

Source data are available online for this figure.

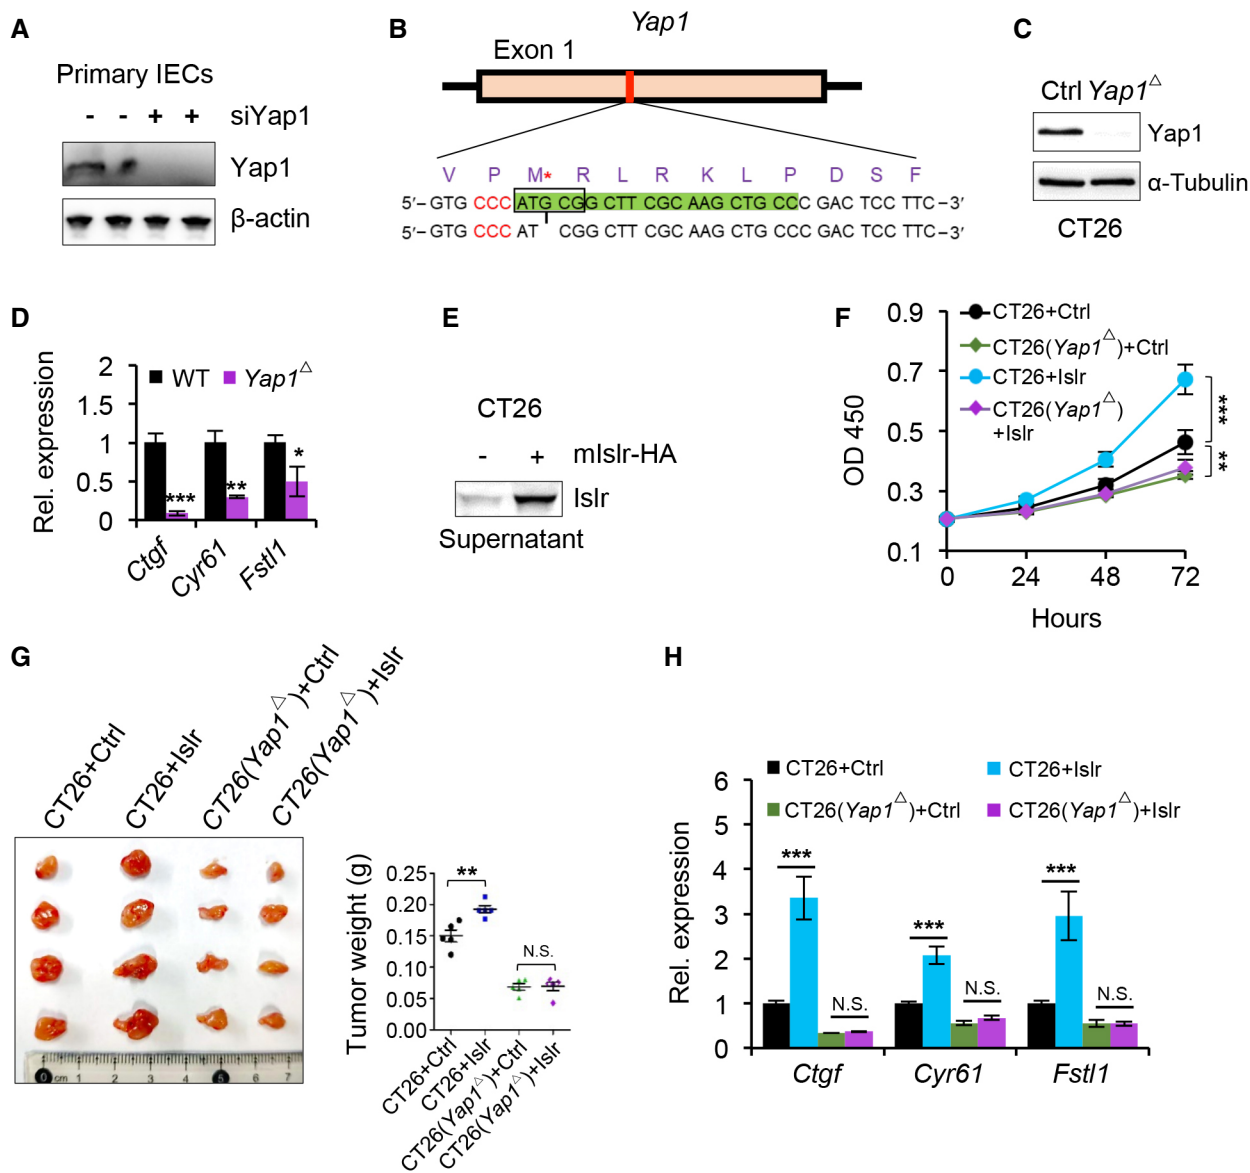

**Figure EV5. Deletion of Yap1 abrogated the mlsr-mediated promoting effect of tumor growth.**

- A Western blotting for Yap1 in primary intestinal epithelial cells 24 h after Yap1 siRNA treatment.  $\beta$ -actin was used as a loading control. The sequences of Yap1 siRNA are in Appendix Table S5.
- B Generating Yap1-deficient CT26 CRC cells using Crispr/Cas9 technique. gRNA marked by green color. Protospacer adjacent motif (PAM) sequence marked by red color. G deletion is indicated by an asterisk.
- C Western blotting for Yap1 in normal and Yap1-deficient (*Yap1*<sup>Δ</sup>) CT26 CRC cells.  $\alpha$ -Tubulin was used as a loading control.
- D qRT-PCR for *Ctgf*, *Cyr61*, and *Fstl1* in normal and Yap1-deficient (*Yap1*<sup>Δ</sup>) CT26 CRC cells; *n* = 3.
- E Western blotting for mlsr in the supernatant from CT26 CRC cells transfected with pcDNA3.1 or pcDNA3.1-mlsr plasmids.
- F The growth curve of CT26 CRC cells under indicated conditions; *n* = 5.
- G Gross images of xenografted tumors 10 days after transplantation. Quantification of tumor weight; *n* = 5.
- H qRT-PCR for *Ctgf*, *Cyr61*, and *Fstl1* in CT26 CRC cells at indicated conditions; *n* = 3.

Data information: In (D, F–H), data are presented as mean  $\pm$  SD. \**P* < 0.05; \*\**P* < 0.01; \*\*\**P* < 0.001 (Student's *t*-test).

Source data are available online for this figure.
